# Supplementary material for: Thermal stability enhancement of an Mn4+-activated germanate phosphor by a cationic non-equivalent substitution strategy
Source: Royal Society of Chemistry journal article supplement (doi:10.1039/d4tc02903h), 2024-01-01
Supplement: d4tc02903h1.pdf [file d4tc02903h1.pdf]

## Supplementary Material

# Thermal Stability Enhancement of Mn<sup>4+</sup>-Activated Germanate Phosphor by Cationic Non-Equivalent Substitution Strategy

Huancheng Wu<sup>a</sup>, Bohua Zhang<sup>a</sup>, Xikun Zou<sup>a</sup>, Maxim S. Molokeev<sup>c</sup>, Xuejie Zhang<sup>a</sup>,  
Ziyi Wang<sup>a</sup>, Xiaoyu Shuang<sup>a</sup>, and Haoran Zhang<sup>a, b, \*</sup>

<sup>a</sup> *Key Laboratory for Biobased Materials and Energy of Ministry of Education, College of Materials and Energy, South China Agricultural University, Guangzhou 510642, P. R. China*

<sup>b</sup> *Maoming Branch, Guangdong Laboratory for Lingnan Modern Agriculture, Maoming 525100, P. R. China*

<sup>c</sup> *Department of Physics and Technical Sciences, Western Caspian University, Baku, AZ 1001, Azerbaijan*

**Table S1.** Main parameters of processing and refinement of the  $\text{Mg}_{14-x}\text{Sc}_x\text{Ge}_{4.99}\text{O}_{24}$ :  $0.01\text{Mn}^{4+}$  samples.

| x     | Space Group | Cell parameters (Å),<br>Cell Volume (Å <sup>3</sup> )                             | $R_{\text{wp}}, R_{\text{p}}, R_{\text{B}}, \chi^2$ |
|-------|-------------|-----------------------------------------------------------------------------------|-----------------------------------------------------|
| 0     | Pbam        | a = 14.514127(90),<br>b = 10.223382(58),<br>c = 5.946442(34),<br>V = 882.3537(90) | 5.8, 4.05, 1.68, 4.58                               |
| 0.125 | Pbam        | a = 14.51892(10),<br>b = 10.221784(68),<br>c = 5.949599(41),<br>V = 882.976(10)   | 4.84, 3.69, 1.68, 3.8                               |
| 0.250 | Pbam        | a = 14.521963(93),<br>b = 10.220562(64),<br>c = 5.951228(37),<br>V = 883.2969(96) | 5.07, 3.89, 1.78, 3.91                              |
| 0.375 | Pbam        | a = 14.52457(14),<br>b = 10.219541(95),<br>c = 5.952588(56),<br>V = 883.569(14)   | 5.82, 4.4, 2.91, 4.51                               |

**Table S2.** Fractional atomic coordinates and isotropic displacement parameters (Å<sup>2</sup>) of  $\text{Mg}_{14-x}\text{Sc}_x\text{Ge}_{4.99}\text{O}_{24}$ :  $0.01\text{Mn}^{4+}$ .

| Atom  | x | y   | z   | $B_{\text{iso}}$ | Occ. |
|-------|---|-----|-----|------------------|------|
| x = 0 |   |     |     |                  |      |
| Mg1   | 0 | 0.5 | 0.5 | 0.391(56)        | 1    |

|     |              |             |             |           |   |
|-----|--------------|-------------|-------------|-----------|---|
| Mg2 | 0            | 0           | 0.5         | 0.391(56) | 1 |
| Mg3 | 0.17553(22)  | 0.18025(30) | 0           | 0.391(56) | 1 |
| Mg4 | 0.32708(23)  | 0.14823(29) | 0.5         | 0.391(56) | 1 |
| Mg5 | 0.99456(14)  | 0.25125(19) | 0.24237(35) | 0.391(56) | 1 |
| Mg6 | 0.33076(15)  | 0.41936(21) | 0.24736(41) | 0.391(56) | 1 |
| Ge1 | 0            | 0           | 0           | 0.347(57) | 1 |
| Ge2 | 0.126126(81) | 0.50227(14) | 0           | 0.347(57) | 1 |
| Ge3 | 0.186640(84) | 0.32551(10) | 0.5         | 0.347(57) | 1 |
| O1  | 0.08404(39)  | 0.33818(58) | 0           | 0.055(59) | 1 |
| O2  | 0.41846(34)  | 0.34567(56) | 0           | 0.055(59) | 1 |
| O3  | 0.25195(38)  | 0.00262(50) | 0           | 0.055(59) | 1 |
| O4  | 0.06889(36)  | 0.32668(55) | 0.5         | 0.055(59) | 1 |
| O5  | 0.41566(38)  | 0.32883(61) | 0.5         | 0.055(59) | 1 |
| O6  | 0.25681(35)  | 0.98324(51) | 0.5         | 0.055(59) | 1 |
| O7  | 0.07440(24)  | 0.07483(37) | 0.23030(77) | 0.055(59) | 1 |
| O8  | 0.41130(23)  | 0.07810(36) | 0.24260(72) | 0.055(59) | 1 |
| O9  | 0.24189(25)  | 0.25188(42) | 0.27360(58) | 0.055(59) | 1 |

---

x = 0.125

---

|     |             |             |     |           |   |
|-----|-------------|-------------|-----|-----------|---|
| Mg1 | 0           | 0.5         | 0.5 | 0.653(34) | 1 |
| Mg2 | 0           | 0           | 0.5 | 0.653(34) | 1 |
| Mg3 | 0.17463(20) | 0.17921(27) | 0   | 0.653(34) | 1 |

|     |              |              |             |           |   |
|-----|--------------|--------------|-------------|-----------|---|
| Mg4 | 0.32589(21)  | 0.14760(26)  | 0.5         | 0.653(34) | 1 |
| Mg5 | 0.99579(14)  | 0.25214(18)  | 0.24093(33) | 0.653(34) | 1 |
| Mg6 | 0.33044(14)  | 0.41882(19)  | 0.24767(37) | 0.653(34) | 1 |
| Ge1 | 0            | 0            | 0           | 0.652(34) | 1 |
| Ge2 | 0.126108(75) | 0.50223(13)  | 0           | 0.652(34) | 1 |
| Ge3 | 0.186430(80) | 0.325187(95) | 0.5         | 0.652(34) | 1 |
| O1  | 0.08390(36)  | 0.33722(53)  | 0           | 0.453(37) | 1 |
| O2  | 0.41882(31)  | 0.34517(51)  | 0           | 0.453(37) | 1 |
| O3  | 0.25168(35)  | 0.99923(47)  | 0           | 0.453(37) | 1 |
| O4  | 0.06791(34)  | 0.33044(50)  | 0.5         | 0.453(37) | 1 |
| O5  | 0.41544(35)  | 0.33194(54)  | 0.5         | 0.453(37) | 1 |
| O6  | 0.25976(33)  | 0.98173(47)  | 0.5         | 0.453(37) | 1 |
| O7  | 0.07534(23)  | 0.07694(34)  | 0.22867(70) | 0.453(37) | 1 |
| O8  | 0.41290(23)  | 0.08125(34)  | 0.24290(66) | 0.453(37) | 1 |
| O9  | 0.24233(24)  | 0.24991(40)  | 0.27157(55) | 0.453(37) | 1 |

---

x = 0.250

---

|     |             |             |             |           |   |
|-----|-------------|-------------|-------------|-----------|---|
| Mg1 | 0           | 0.5         | 0.5         | 0.375(51) | 1 |
| Mg2 | 0           | 0           | 0.5         | 0.375(51) | 1 |
| Mg3 | 0.17399(21) | 0.17978(29) | 0           | 0.375(51) | 1 |
| Mg4 | 0.32616(22) | 0.14743(27) | 0.5         | 0.375(51) | 1 |
| Mg5 | 0.99615(14) | 0.25239(18) | 0.24074(34) | 0.375(51) | 1 |

|     |              |              |             |           |   |
|-----|--------------|--------------|-------------|-----------|---|
| Mg6 | 0.33053(15)  | 0.41865(20)  | 0.24584(38) | 0.375(51) | 1 |
| Ge1 | 0            | 0            | 0           | 0.379(52) | 1 |
| Ge2 | 0.126623(77) | 0.50248(13)  | 0           | 0.379(52) | 1 |
| Ge3 | 0.186747(83) | 0.325280(98) | 0.5         | 0.379(52) | 1 |
| O1  | 0.08252(37)  | 0.33921(53)  | 0           | 0.062(54) | 1 |
| O2  | 0.41853(32)  | 0.34689(52)  | 0           | 0.062(54) | 1 |
| O3  | 0.25286(36)  | 0.99996(47)  | 0           | 0.062(54) | 1 |
| O4  | 0.07112(34)  | 0.32724(50)  | 0.5         | 0.062(54) | 1 |
| O5  | 0.41630(36)  | 0.33277(55)  | 0.5         | 0.062(54) | 1 |
| O6  | 0.25799(34)  | 0.97999(47)  | 0.5         | 0.062(54) | 1 |
| O7  | 0.07449(23)  | 0.07624(34)  | 0.22600(71) | 0.062(54) | 1 |
| O8  | 0.41159(23)  | 0.08183(34)  | 0.24465(67) | 0.062(54) | 1 |
| O9  | 0.24424(25)  | 0.25049(40)  | 0.27558(53) | 0.062(54) | 1 |

---

$x = 0.375$

---

|     |             |             |             |           |   |
|-----|-------------|-------------|-------------|-----------|---|
| Mg1 | 0           | 0.5         | 0.5         | 0.721(50) | 1 |
| Mg2 | 0           | 0           | 0.5         | 0.721(50) | 1 |
| Mg3 | 0.17353(28) | 0.18013(38) | 0           | 0.721(50) | 1 |
| Mg4 | 0.32650(30) | 0.14851(35) | 0.5         | 0.721(50) | 1 |
| Mg5 | 0.99638(20) | 0.25280(23) | 0.24110(45) | 0.721(50) | 1 |
| Mg6 | 0.32973(20) | 0.41968(26) | 0.24700(52) | 0.721(50) | 1 |
| Ge1 | 0           | 0           | 0           | 0.860(50) | 1 |

|     |             |             |             |           |   |
|-----|-------------|-------------|-------------|-----------|---|
| Ge2 | 0.12669(11) | 0.50219(18) | 0           | 0.860(50) | 1 |
| Ge3 | 0.18670(11) | 0.32525(13) | 0.5         | 0.860(50) | 1 |
| O1  | 0.08236(50) | 0.33848(73) | 0           | 0.620(53) | 1 |
| O2  | 0.41579(43) | 0.34375(70) | 0           | 0.620(53) | 1 |
| O3  | 0.25172(50) | 0.99785(63) | 0           | 0.620(53) | 1 |
| O4  | 0.07074(47) | 0.32807(68) | 0.5         | 0.620(53) | 1 |
| O5  | 0.41801(49) | 0.33301(74) | 0.5         | 0.620(53) | 1 |
| O6  | 0.25915(46) | 0.98169(63) | 0.5         | 0.620(53) | 1 |
| O7  | 0.07593(32) | 0.07735(47) | 0.23228(99) | 0.620(53) | 1 |
| O8  | 0.41236(32) | 0.08223(46) | 0.23992(91) | 0.620(53) | 1 |
| O9  | 0.24295(34) | 0.24910(54) | 0.27070(76) | 0.620(53) | 1 |

**Table S3.** Main bond lengths (Å) of  $\text{Mg}_{14-x}\text{Sc}_x\text{Ge}_{4.99}\text{O}_{24} : 0.01\text{Mn}^{4+}$ .

| $x = 0$                |            |                       |            |
|------------------------|------------|-----------------------|------------|
| Mg1—O4 <sup>i</sup>    | 2.0345(55) | Mg1—O8 <sup>ii</sup>  | 2.1535(38) |
| Mg2—O5 <sup>iii</sup>  | 2.1355(60) | Mg2—O7 <sup>iv</sup>  | 2.0792(42) |
| Mg3—O1 <sup>v</sup>    | 2.0904(66) | Mg3—O3 <sup>v</sup>   | 2.1279(60) |
| Mg3—O7 <sup>v</sup>    | 2.2784(47) | Mg3—O9 <sup>v</sup>   | 2.0275(40) |
| Mg4—O5 <sup>vi</sup>   | 2.2498(67) | Mg4—O6 <sup>vii</sup> | 1.9711(60) |
| Mg4—O8 <sup>vi</sup>   | 2.0859(44) | Mg4—O9 <sup>vi</sup>  | 2.1128(44) |
| Mg5—O1 <sup>viii</sup> | 2.1339(47) | Mg5—O2 <sup>ix</sup>  | 2.0685(43) |
| Mg5—O4 <sup>x</sup>    | 2.0262(40) | Mg5—O5 <sup>xi</sup>  | 2.0805(44) |

|                         |            |                        |            |
|-------------------------|------------|------------------------|------------|
| Mg5—O7 <sup>xii</sup>   | 2.1449(41) | Mg5—O8 <sup>xiii</sup> | 2.1222(40) |
| Mg6—O2 <sup>v</sup>     | 2.0859(43) | Mg6—O3 <sup>xiv</sup>  | 2.0806(44) |
| Mg6—O5 <sup>vi</sup>    | 2.1521(47) | Mg6—O6 <sup>iii</sup>  | 2.0733(42) |
| Mg6—O7 <sup>xv</sup>    | 2.1050(42) | Mg6—O9 <sup>xvi</sup>  | 2.1493(46) |
| Ge1—O2 <sup>xvii</sup>  | 1.9723(54) | Ge1—O7                 | 1.9044(41) |
| Ge2—O1 <sup>xviii</sup> | 3.4591(58) | Ge2—O1 <sup>v</sup>    | 1.7853(60) |
| Ge2—O3 <sup>xiv</sup>   | 1.7696(56) | Ge2—O6 <sup>xvii</sup> | 3.4299(26) |
| Ge2—O8 <sup>xiv</sup>   | 1.7254(41) | Ge2—O9 <sup>v</sup>    | 3.4673(41) |
| Ge3—O1 <sup>v</sup>     | 3.3278(26) | Ge3—O4 <sup>vi</sup>   | 1.7090(53) |
| Ge3—O5 <sup>vi</sup>    | 3.3241(56) | Ge3—O6 <sup>iii</sup>  | 1.8094(52) |
| Ge3—O7 <sup>vi</sup>    | 3.4342(40) | Ge3—O8 <sup>ii</sup>   | 3.3214(38) |
| Ge3—O9 <sup>vi</sup>    | 1.7384(37) |                        |            |

---

x = 0.125

---

|                        |            |                       |            |
|------------------------|------------|-----------------------|------------|
| Mg1—O4 <sup>i</sup>    | 1.9940(50) | Mg1—O8 <sup>ii</sup>  | 2.1514(36) |
| Mg2—O5 <sup>iii</sup>  | 2.1114(53) | Mg2—O7 <sup>iv</sup>  | 2.1026(38) |
| Mg3—O1 <sup>v</sup>    | 2.0842(60) | Mg3—O3 <sup>xix</sup> | 2.1531(56) |
| Mg3—O7 <sup>v</sup>    | 2.2409(43) | Mg3—O9 <sup>v</sup>   | 2.0246(38) |
| Mg4—O5 <sup>vi</sup>   | 2.2893(60) | Mg4—O6 <sup>vii</sup> | 1.9484(55) |
| Mg4—O8 <sup>vi</sup>   | 2.0965(41) | Mg4—O9 <sup>vi</sup>  | 2.1006(41) |
| Mg5—O1 <sup>viii</sup> | 2.1089(43) | Mg5—O2 <sup>ix</sup>  | 2.0719(39) |
| Mg5—O4 <sup>x</sup>    | 2.0280(37) | Mg5—O5 <sup>xi</sup>  | 2.1155(40) |

|                         |            |                        |            |
|-------------------------|------------|------------------------|------------|
| Mg5—O7 <sup>xii</sup>   | 2.1322(39) | Mg5—O8 <sup>xiii</sup> | 2.0853(39) |
| Mg6—O2 <sup>v</sup>     | 2.0939(39) | Mg6—O3 <sup>xvii</sup> | 2.0660(40) |
| Mg6—O5 <sup>vi</sup>    | 2.1366(42) | Mg6—O6 <sup>iii</sup>  | 2.0934(39) |
| Mg6—O7 <sup>xv</sup>    | 2.1204(39) | Mg6—O9 <sup>xvi</sup>  | 2.1535(43) |
| Ge1—O2 <sup>xvii</sup>  | 1.9733(49) | Ge1—O7                 | 1.9146(37) |
| Ge2—O1 <sup>xviii</sup> | 3.4626(53) | Ge2—O1 <sup>v</sup>    | 1.7945(55) |
| Ge2—O3 <sup>xvii</sup>  | 1.7746(51) | Ge2—O6 <sup>xvii</sup> | 3.4116(24) |
| Ge2—O8 <sup>xiv</sup>   | 1.7497(38) | Ge2—O9 <sup>v</sup>    | 3.4799(39) |
| Ge3—O1 <sup>v</sup>     | 3.3287(24) | Ge3—O4 <sup>vi</sup>   | 1.7216(50) |
| Ge3—O5 <sup>vi</sup>    | 3.3256(52) | Ge3—O6 <sup>iii</sup>  | 1.7806(49) |
| Ge3—O7 <sup>vi</sup>    | 3.4126(37) | Ge3—O8 <sup>ii</sup>   | 3.3571(36) |
| Ge3—O9 <sup>vi</sup>    | 1.7600(35) |                        |            |

---

$x = 0.25$

---

|                       |            |                        |            |
|-----------------------|------------|------------------------|------------|
| Mg1—O4 <sup>i</sup>   | 2.0455(50) | Mg1—O8 <sup>ii</sup>   | 2.1580(36) |
| Mg2—O5 <sup>iii</sup> | 2.0973(54) | Mg2—O7 <sup>iv</sup>   | 2.1062(39) |
| Mg3—O1 <sup>v</sup>   | 2.1022(61) | Mg3—O3 <sup>xix</sup>  | 2.1655(57) |
| Mg3—O7 <sup>v</sup>   | 2.2397(44) | Mg3—O9 <sup>v</sup>    | 2.0622(38) |
| Mg4—O6 <sup>vii</sup> | 1.9770(56) | Mg4—O8 <sup>vi</sup>   | 2.0731(42) |
| Mg4—O9 <sup>vi</sup>  | 2.0756(42) | Mg5—O1 <sup>viii</sup> | 2.1007(44) |
| Mg5—O2 <sup>ix</sup>  | 2.0863(41) | Mg5—O4 <sup>x</sup>    | 2.0374(38) |
| Mg5—O5 <sup>xi</sup>  | 2.1172(41) | Mg5—O7 <sup>xii</sup>  | 2.1314(39) |



|                        |            |                         |            |
|------------------------|------------|-------------------------|------------|
| Mg5—O8 <sup>xiii</sup> | 2.0926(39) | Mg6—O2 <sup>v</sup>     | 2.0764(40) |
| Mg6—O3 <sup>xvii</sup> | 2.0730(42) | Mg6—O5 <sup>vi</sup>    | 2.1470(43) |
| Mg6—O6 <sup>iii</sup>  | 2.0816(40) | Mg6—O7 <sup>xv</sup>    | 2.1238(40) |
| Mg6—O9 <sup>xvi</sup>  | 2.1343(44) | Ge1—O2 <sup>xvii</sup>  | 1.9617(50) |
| Ge1—O7                 | 1.8937(38) | Ge2—O1 <sup>xviii</sup> | 3.4412(55) |
| Ge2—O1 <sup>v</sup>    | 1.7873(55) | Ge2—O3 <sup>xvii</sup>  | 1.7503(53) |
| Ge2—O6 <sup>xvii</sup> | 3.4227(25) | Ge2—O8 <sup>xiv</sup>   | 1.7565(38) |
| Ge2—O9 <sup>v</sup>    | 3.4985(39) | Ge3—O1 <sup>v</sup>     | 3.3414(25) |
| Ge3—O4 <sup>vi</sup>   | 1.6792(50) | Ge3—O5 <sup>vi</sup>    | 3.3344(53) |
| Ge3—O6 <sup>iii</sup>  | 1.7732(49) | Ge3—O7 <sup>vi</sup>    | 3.4344(37) |
| Ge3—O8 <sup>ii</sup>   | 3.3502(36) | Ge3—O9 <sup>vi</sup>    | 1.7507(35) |

---

x = 0.375

---

|                        |            |                        |            |
|------------------------|------------|------------------------|------------|
| Mg1—O4 <sup>i</sup>    | 2.0354(69) | Mg1—O8 <sup>ii</sup>   | 2.1733(50) |
| Mg2—O5 <sup>iii</sup>  | 2.0809(74) | Mg2—O7 <sup>iv</sup>   | 2.0930(54) |
| Mg3—O1 <sup>v</sup>    | 2.0910(83) | Mg3—O3 <sup>xix</sup>  | 2.1817(77) |
| Mg3—O7 <sup>v</sup>    | 2.2415(60) | Mg3—O9 <sup>v</sup>    | 2.0273(53) |
| Mg4—O6 <sup>vii</sup>  | 1.9655(75) | Mg4—O8 <sup>vi</sup>   | 2.1001(58) |
| Mg4—O9 <sup>vi</sup>   | 2.0958(57) | Mg5—O1 <sup>viii</sup> | 2.0942(59) |
| Mg5—O2 <sup>ix</sup>   | 2.0984(55) | Mg5—O4 <sup>x</sup>    | 2.0330(52) |
| Mg5—O5 <sup>xi</sup>   | 2.1070(56) | Mg5—O7 <sup>xii</sup>  | 2.1337(53) |
| Mg5—O8 <sup>xiii</sup> | 2.0812(53) | Mg6—O2 <sup>v</sup>    | 2.0799(54) |

|                        |            |                         |            |
|------------------------|------------|-------------------------|------------|
| Mg6—O3 <sup>xvii</sup> | 2.0492(57) | Mg6—O5 <sup>vi</sup>    | 2.1671(60) |
| Mg6—O6 <sup>iii</sup>  | 2.0823(54) | Mg6—O7 <sup>xv</sup>    | 2.1169(54) |
| Mg6—O9 <sup>xvi</sup>  | 2.1558(59) | Ge1—O2 <sup>xvii</sup>  | 2.0114(68) |
| Ge1—O7                 | 1.9372(53) | Ge2—O1 <sup>xviii</sup> | 3.4454(74) |
| Ge2—O1 <sup>v</sup>    | 1.7926(76) | Ge2—O3 <sup>xvii</sup>  | 1.7665(74) |
| Ge2—O6 <sup>xvii</sup> | 3.4134(33) | Ge2—O8 <sup>xiv</sup>   | 1.7407(52) |
| Ge2—O9 <sup>v</sup>    | 3.4839(54) | Ge3—O1 <sup>v</sup>     | 3.3426(33) |
| Ge3—O4 <sup>vi</sup>   | 1.6845(70) | Ge3—O5 <sup>vi</sup>    | 3.3606(72) |
| Ge3—O6 <sup>iii</sup>  | 1.7817(66) | Ge3—O7 <sup>vi</sup>    | 3.3979(51) |
| Ge3—O8 <sup>ii</sup>   | 3.3710(50) | Ge3—O9 <sup>vi</sup>    | 1.7709(49) |

Symmetry codes: (i) -x, -y+1, -z+1; (ii) -x+1/2, y+1/2, -z+1; (iii) -x+1/2, y+1/2, -z+1; (iv) -x, -y, -z+1; (v) x, y, -z; (vi) x, y, -z+1; (vii) x, y-1, -z+1; (viii) x+1, y, -z; (ix) x+1/2, -y+1/2, -z; (x) x+1, y, -z+1; (xi) x+1/2, -y+1/2, -z+1; (xii) x+1, y, z; (xiii) x+1/2, -y+1/2, z; (xiv) -x+1/2, y+1/2, -z; (xv) -x+1/2, y+1/2, z; (xvi) x, y, z; (xvii) -x+1/2, y+1/2, -z; (xviii) -x, -y+1, -z; (xix) x, y-1, -z.

**Table S4.** The XPS elemental analysis of MSGO: 0.01Mn<sup>4+</sup>.

| Element       | Mg    | Sc   | Ge    | O            | Mn   |
|---------------|-------|------|-------|--------------|------|
| Theory (%)    | 28.05 | 0.51 | 10.18 | <b>48.96</b> | 0.02 |
| XPS value (%) | 25.56 | 0.43 | 11.27 | <b>51.34</b> | 0.03 |

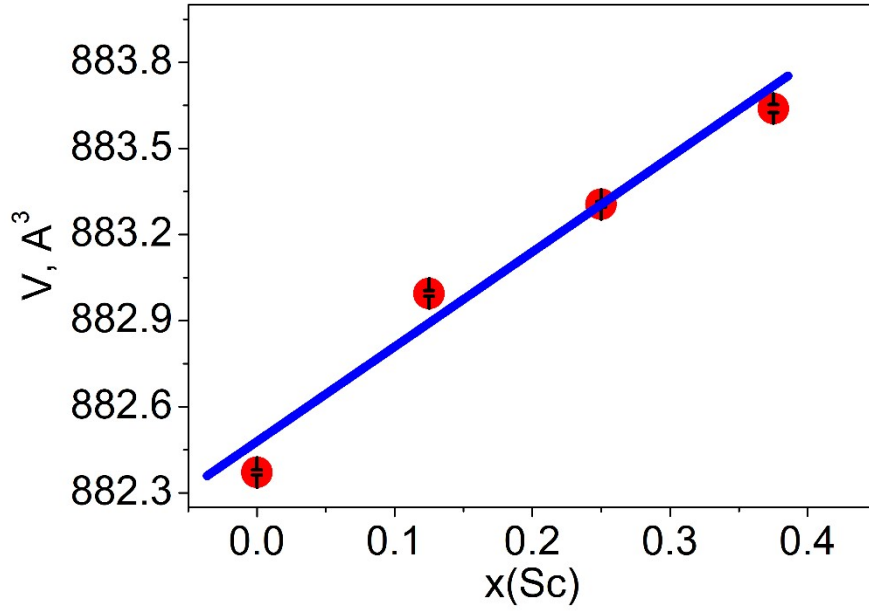

**Fig. S1.** Relationship between cell volume( $V$ ) and concentration ( $x$ ) about  $\text{Mg}_{14-x}\text{Sc}_x\text{Ge}_{4.99}\text{O}_{24}: 0.01\text{Mn}^{4+}$ .

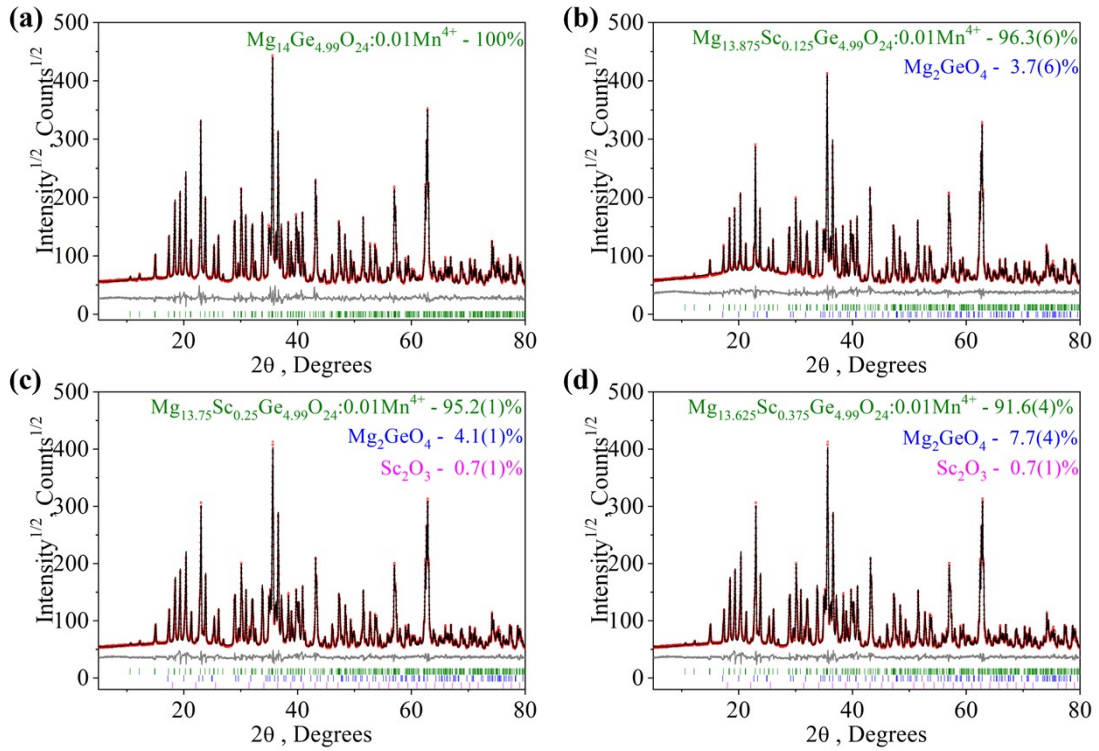

**Fig. S2.** Difference rietveld plot of  $\text{Mg}_{14-x}\text{Sc}_x\text{Ge}_{4.99}\text{O}_{24}: 0.01\text{Mn}^{4+}$ , (a)  $x = 0$ , (b)  $x = 0.125$ , (c)  $x = 0.25$ , (d)  $x = 0.375$ .

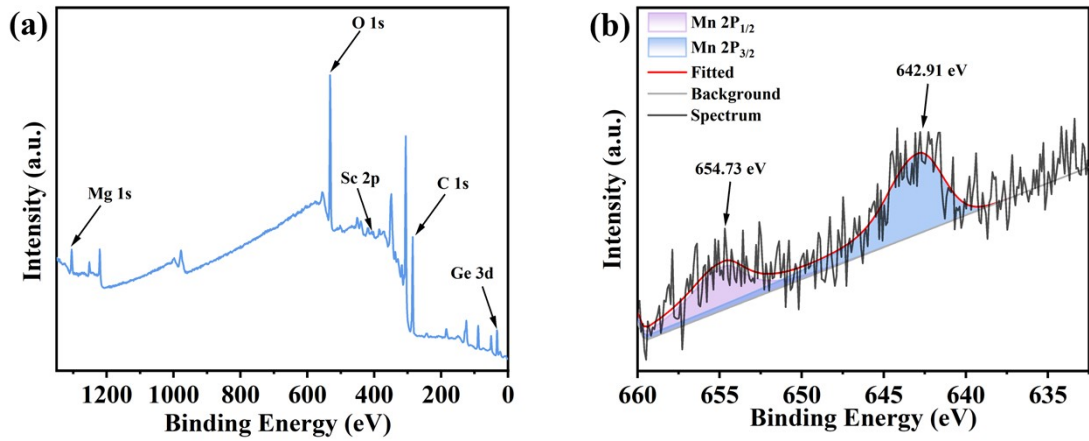

**Fig. S3.** (a) XPS survey spectrum of  $\text{Mg}_{13.75}\text{Sc}_{0.25}\text{Ge}_{4.99}\text{O}_{24}: 0.01\text{Mn}^{4+}$ , (b) the high resolution XPS of Mn 2p.

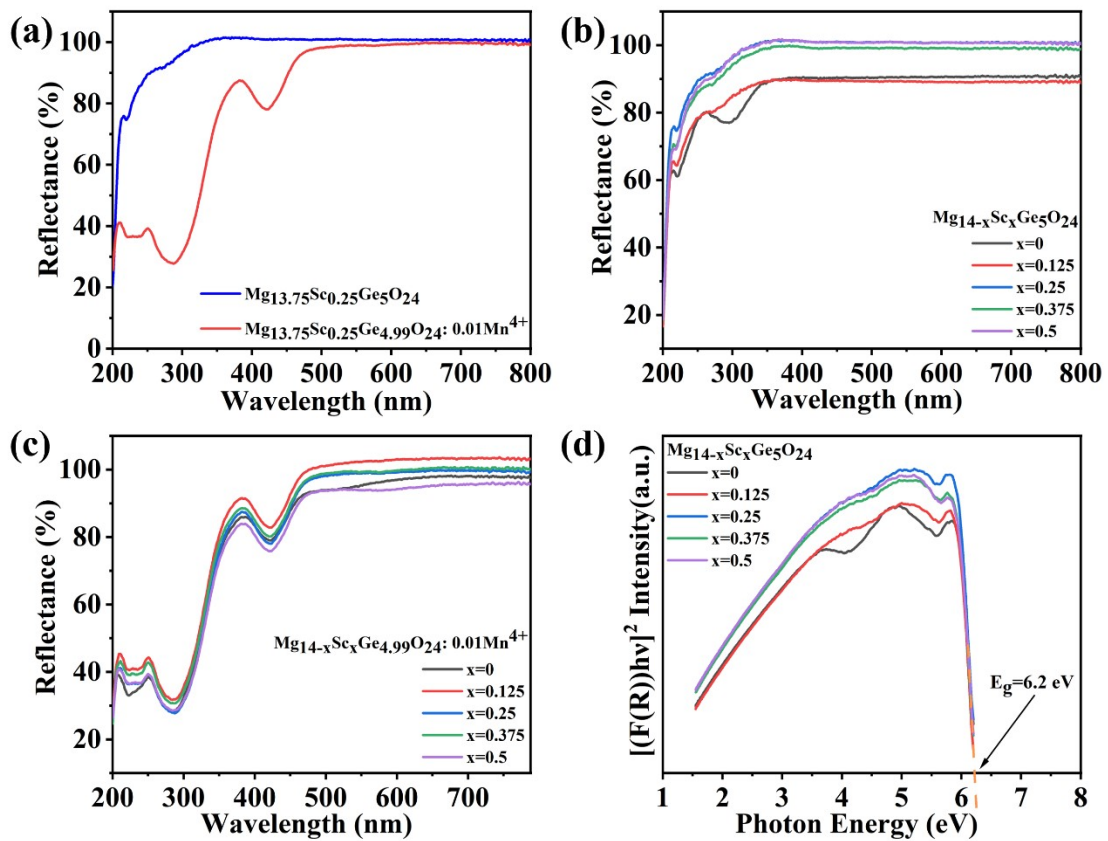

**Fig. S4.** Diffuse reflectance spectra of (a)  $\text{Mg}_{13.75}\text{Sc}_{0.25}\text{Ge}_{5-y}\text{O}_{24}: y\text{Mn}^{4+}$  ( $y=0, 0.01$ ), (b)  $\text{Mg}_{14-x}\text{Sc}_x\text{Ge}_5\text{O}_{24}$  and (c)  $\text{Mg}_{14-x}\text{Sc}_x\text{Ge}_{4.99}\text{O}_{24}: 0.01\text{Mn}^{4+}$ . (d) Relationship between  $[(F(R))h\nu]^2$  and photon energy of the  $\text{Mg}_{14-x}\text{Sc}_x\text{Ge}_{4.99}\text{O}_{24}$  samples.

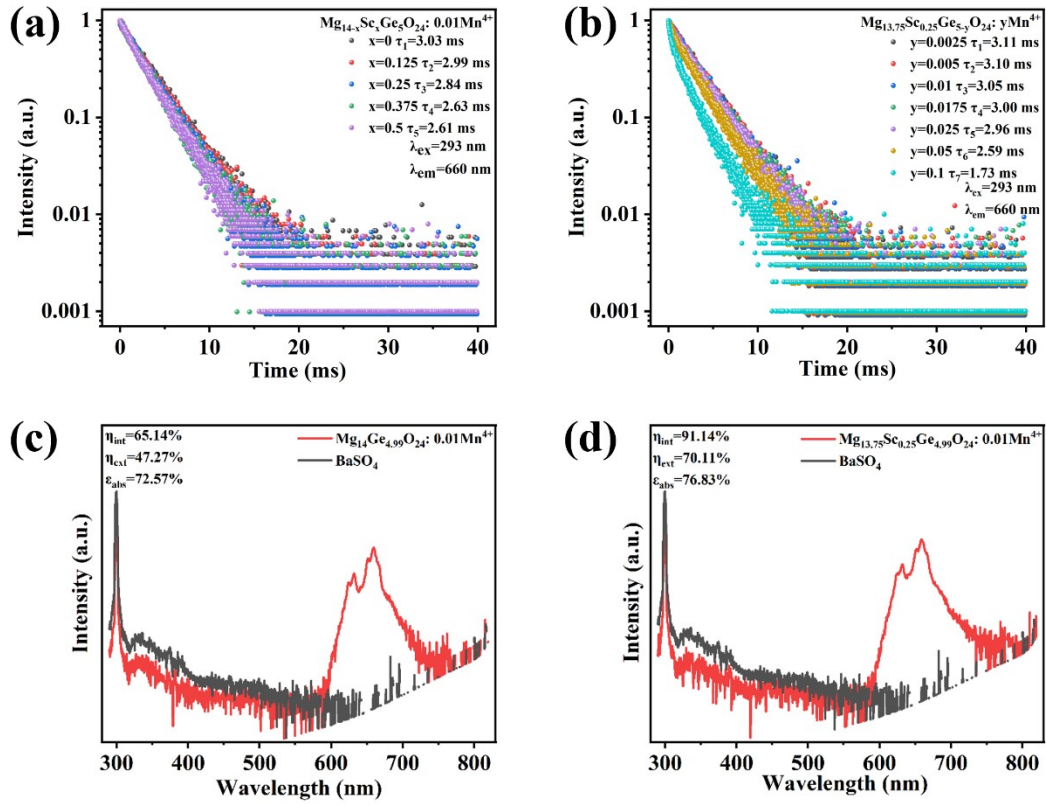

**Fig. S5.** Decay curves of (a)  $\text{Mg}_{14-x}\text{Sc}_x\text{Ge}_{4.99}\text{O}_{24}: 0.01\text{Mn}^{4+}$  and (b)  $\text{Mg}_{13.75}\text{Sc}_{0.25}\text{Ge}_{5-y}\text{O}_{24}: y\text{Mn}^{4+}$  phosphors at room temperature ( $\lambda_{\text{em}} = 660$  nm and  $\lambda_{\text{ex}} = 293$  nm); Quantum efficiency spectra of (c)  $\text{Mg}_{14}\text{Ge}_{4.99}\text{O}_{24}: 0.01\text{Mn}^{4+}$  and (d)  $\text{Mg}_{13.75}\text{Sc}_{0.25}\text{Ge}_{4.99}\text{O}_{24}: 0.01\text{Mn}^{4+}$  phosphor at room temperature ( $\lambda_{\text{em}} = 660$  nm and  $\lambda_{\text{ex}} = 293$  nm).

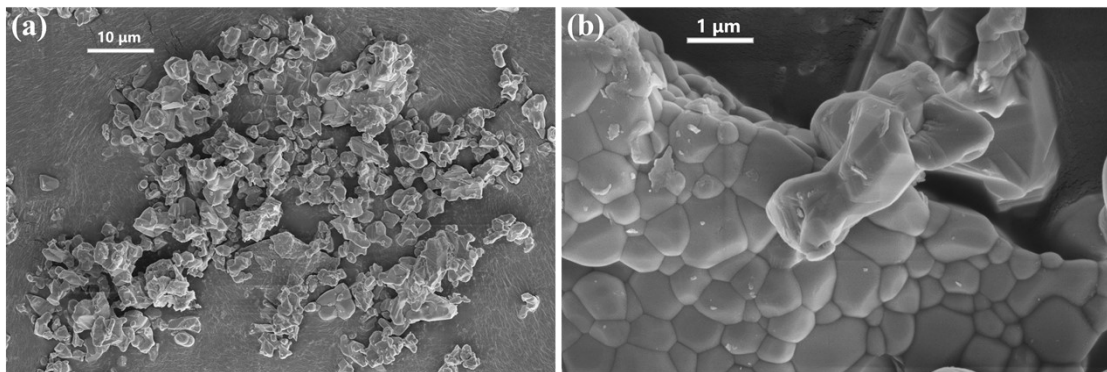

**Fig. S6.** (a)-(b) The SEM images of  $\text{Mg}_{13.75}\text{Sc}_{0.25}\text{Ge}_{4.99}\text{O}_{24}: 0.01\text{Mn}^{4+}$  phosphor.

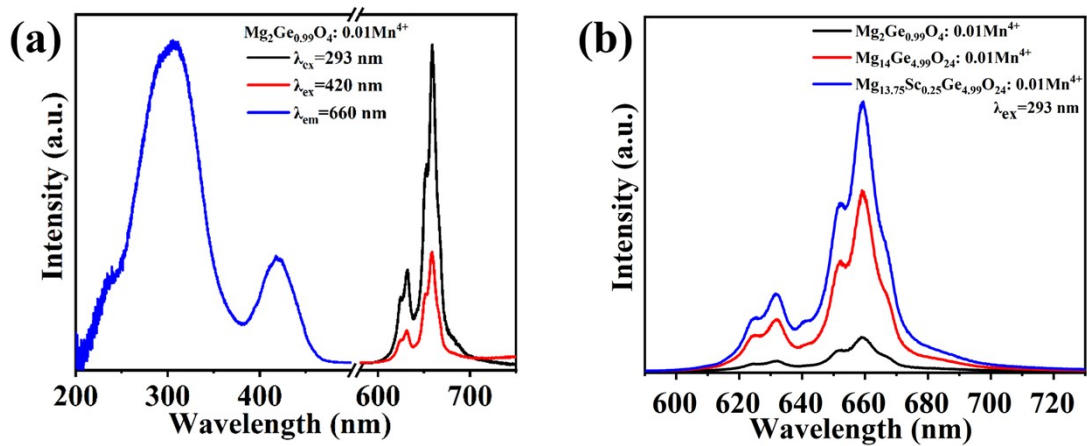

**Fig. S7.** (a) Excitation and emission spectra of  $\text{Mg}_2\text{Ge}_{0.99}\text{O}_4: 0.01\text{Mn}^{4+}$ , (b) Emission spectra of  $\text{Mg}_2\text{Ge}_{0.99}\text{O}_4: 0.01\text{Mn}^{4+}$ ,  $\text{Mg}_{14}\text{Ge}_{4.99}\text{O}_{24}: 0.01\text{Mn}^{4+}$ , and  $\text{Mg}_{13.75}\text{Sc}_{0.25}\text{Ge}_{4.99}\text{O}_{24}: 0.01\text{Mn}^{4+}$  under 293 nm excitation.
